# Supplementary material for: Enzyme Treatment-Free and Ligation-Independent Cloning Using Caged Primers in Polymerase Chain Reactions
Source: MDPI journal article supplement (doi:10.3390/molecules17010328), 2011-12-30
Supplement: s1 [file s1]

Supporting Information for:

# "Restriction-Enzyme-Free and Ligation-Independent Cloning Using Caged Primers in Polymerase Chain Reaction"

Akinori Kuzuya, Keita Tanaka, Hitoshi Katada, and Makoto Komiyama

(a)

Forward

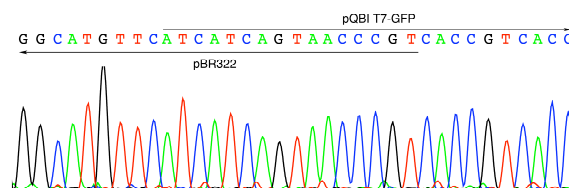

Reverse

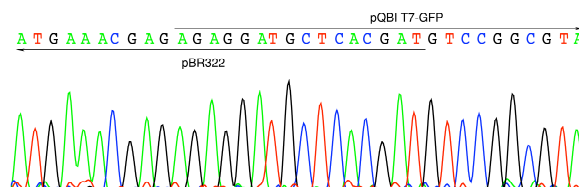

(b)

Forward

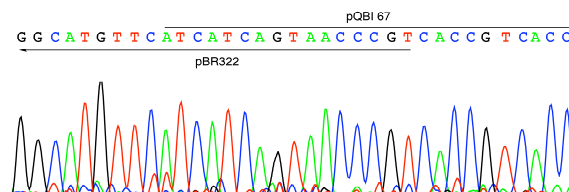

Reverse

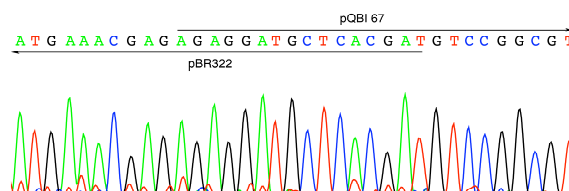

(c)

Forward

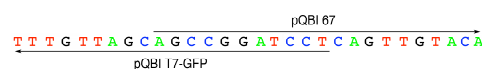

Reverse

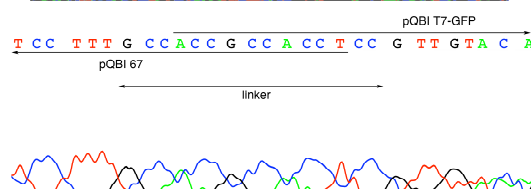

**Supporting Figure 1.** Sequencing of the recombinant plasmids. (a) A GFP-recombinant. (b) A BFP-recombinant. (c) One of the fusion recombinant.
